# Supplementary material for: A RGS7-CaMKII complex drives myocyte-intrinsic and myocyte-extrinsic mechanisms of chemotherapy-induced cardiotoxicity
Source: PubMed Central journal article supplement — Proc Natl Acad Sci U S A. 2022 Dec 27;120(1):e2213537120. doi: 10.1073/pnas.2213537120 (PMC9910480; doi:10.1073/pnas.2213537120), 2022-12-27
Supplement: pnas.2213537120.sd01.pdf [file pnas.2213537120.sd01.pdf]

FSTL1\_Human Heart Chemo Cardiac Pheno

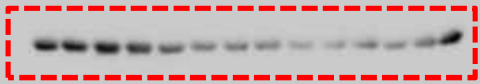

RGS7\_Chemo Human Heart\_set 2

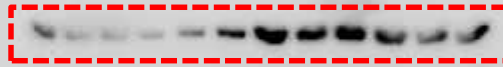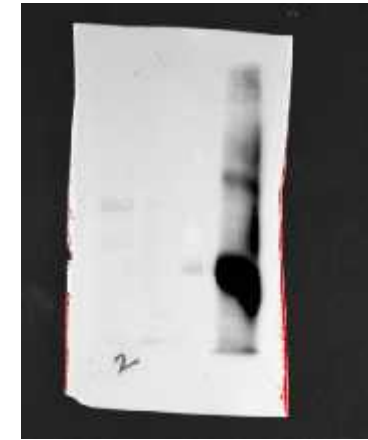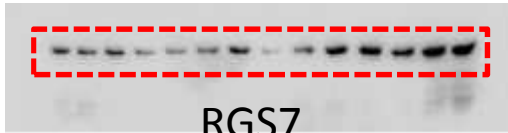

RGS7

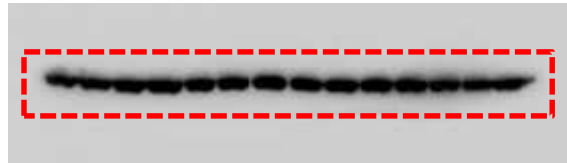

Actin\_Human Heart Phenotype

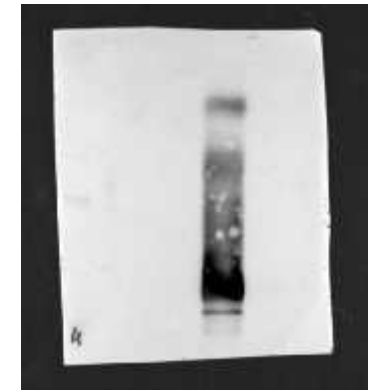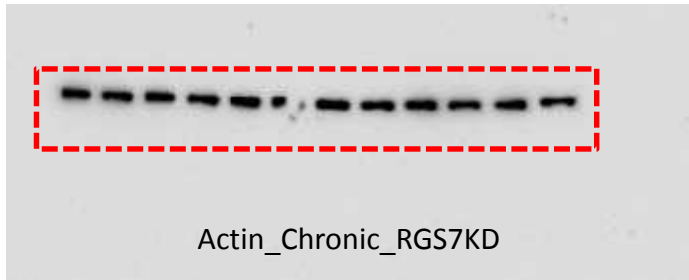

Actin\_Chronic\_RGS7KD

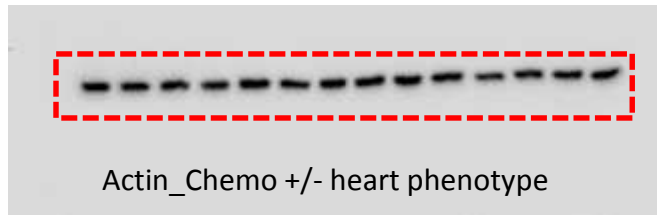

Actin\_Chemo +/- heart phenotype

Actin\_Exp1\_10% serum+/-TGGb1 i

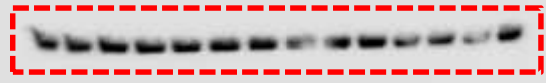

Actin\_RGS7\_NRg1\_TGF

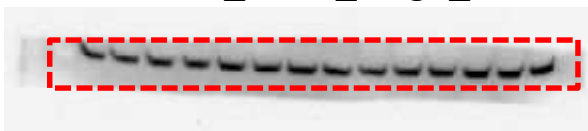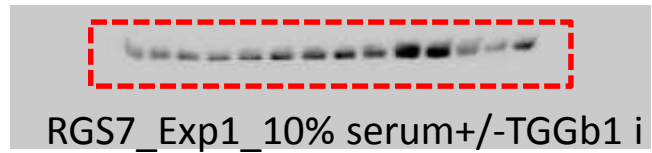

RGS7\_Exp1\_10% serum+/-TGGb1 i

RGS7\_Fstl1

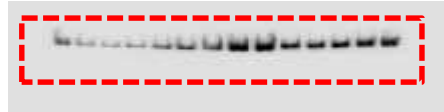

CaMKII\_RGS7 IP

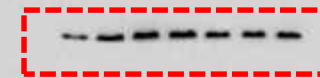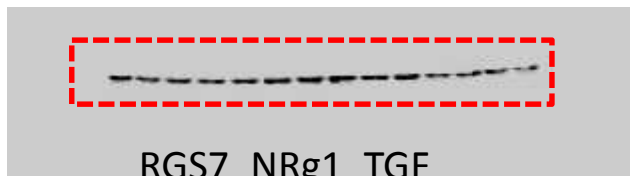

RGS7\_NRg1\_TGF

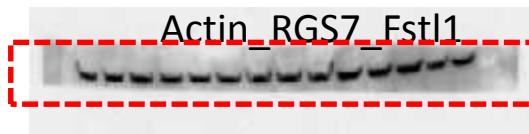

Actin\_RGS7\_Fstl1

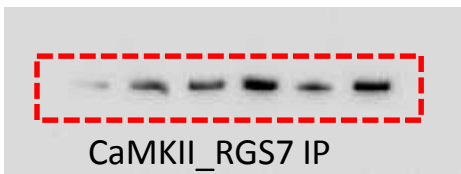

CaMKII\_RGS7 IP

ox-CaMKII\_Chronic\_Drugs

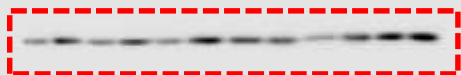

CaMKII\_Acute\_Dox/Pacl/5FU

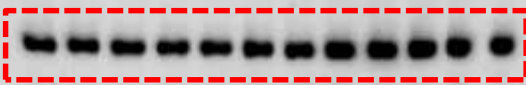

p-CaMKII\_Human sample

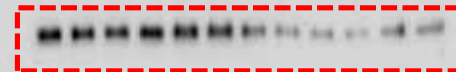

RGS7

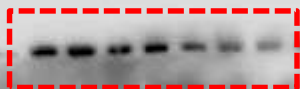

CaMKII\_Human sample

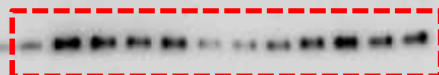

CaMKII\_drugs\_Ac16

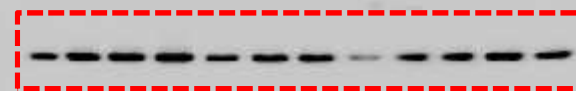

Actin\_Acute

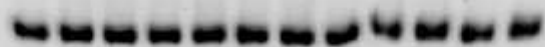

Actin\_VCM\_Drugs

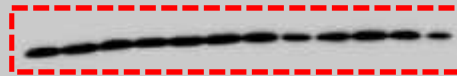

RGS7

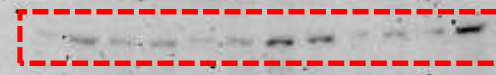

3B

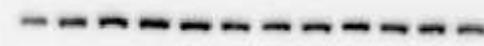

Actin\_Chemo exposed

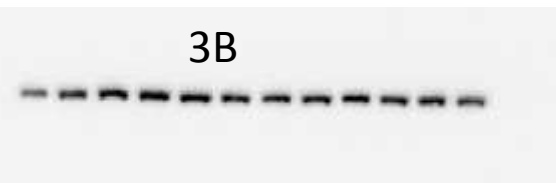

RGS7\_Mice\_Chronic\_Dox/Pacl/5FU

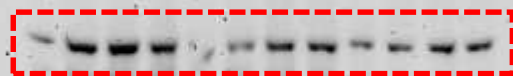

pCaMKII\_drugs\_Ac16

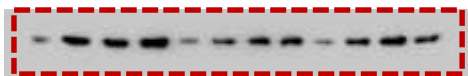

βMHC\_Coculture\_Dox\_RGS7KD

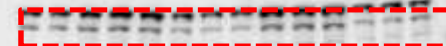

IP blots

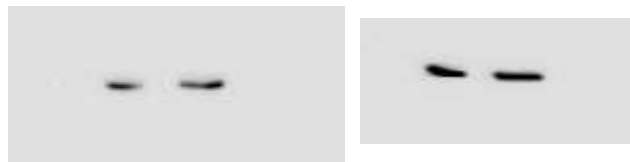

Ox-CaMKII\_Human sample

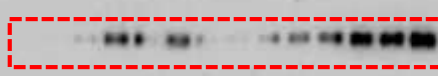

Actin\_shRGS7\_GW

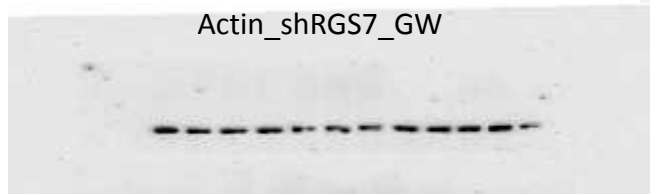

Actin\_shRGS7\_Dox

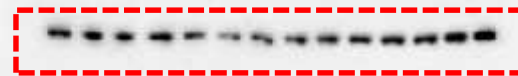

pCaMKII (set 1)\_Chronic\_Drugs

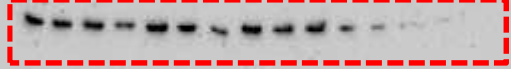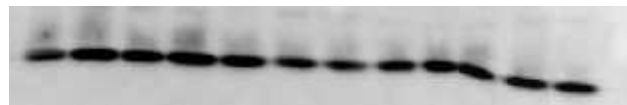

Actin\_OE Exp\_Chemo

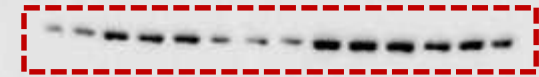

ANP\_coculture\_Dox\_RGS7KD

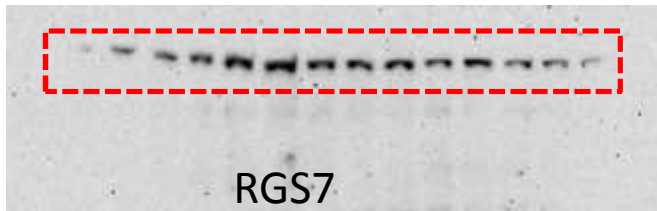

RGS7

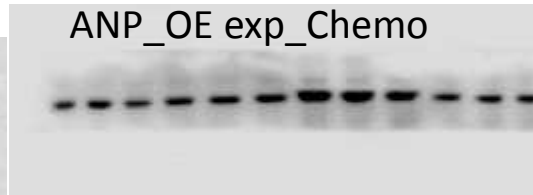

ANP\_OE exp\_Chemo

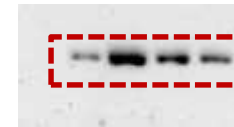

ANP\_shRGS\_Fstl1\_Set 1

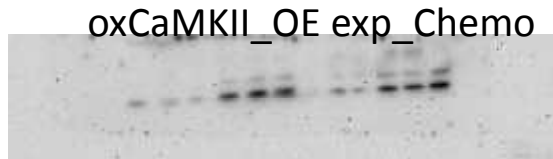

oxCaMKII\_OE exp\_Chemo

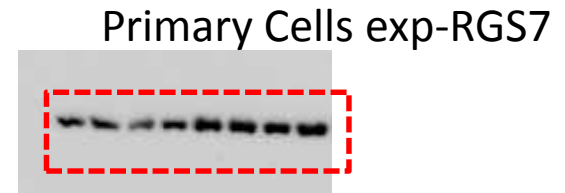

Primary Cells exp-RGS7

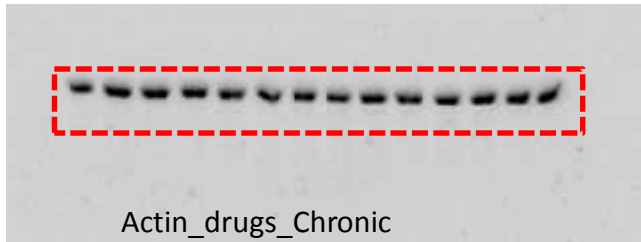

Actin\_drugs\_Chronic

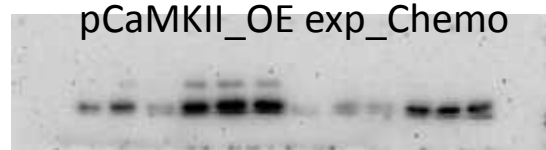

pCaMKII\_OE exp\_Chemo

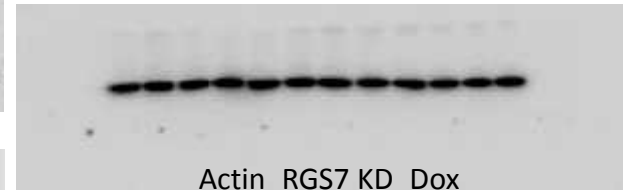

Actin\_RGS7 KD\_Dox

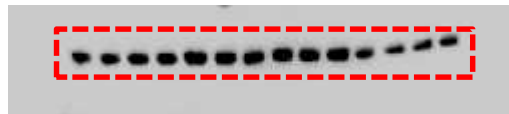

Ox-CaMKII (set 1)\_Acute\_Drugs

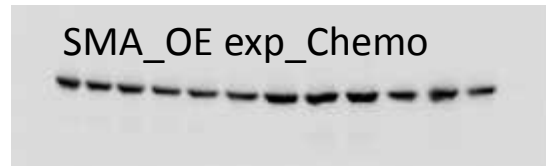

SMA\_OE exp\_Chemo

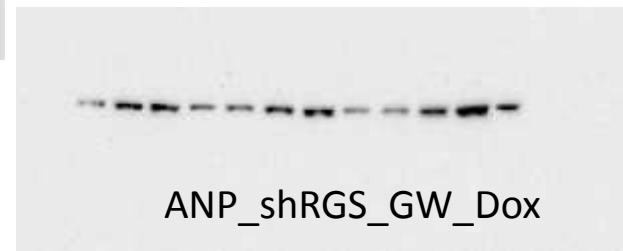

ANP\_shRGS\_GW\_Dox

CaMKII (set 1)\_Chronic Heart

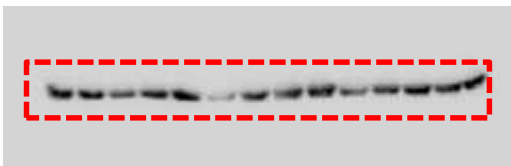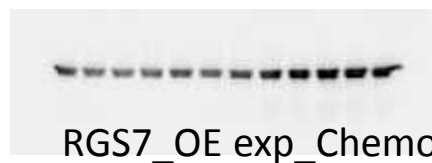

RGS7\_OE exp\_Chemo

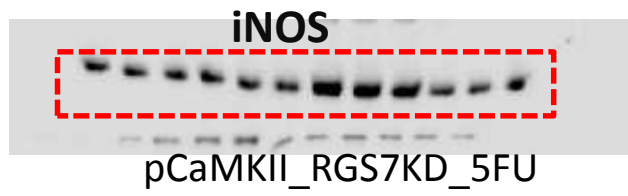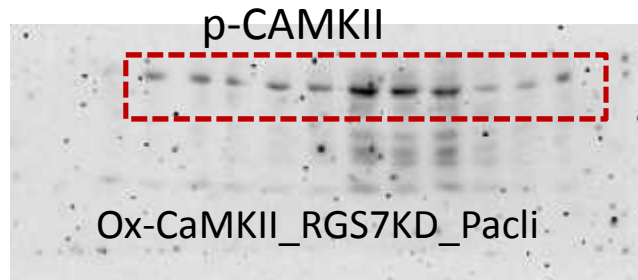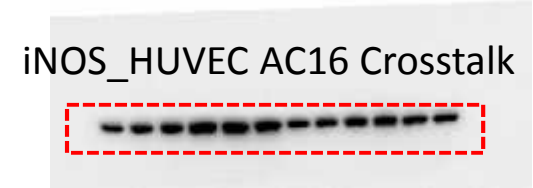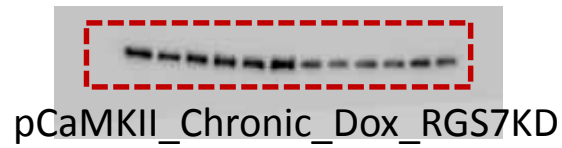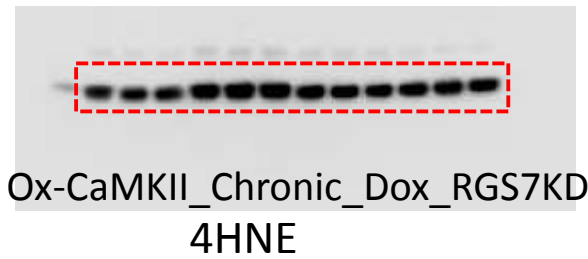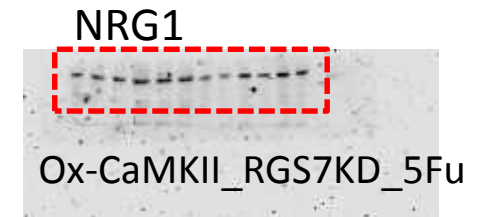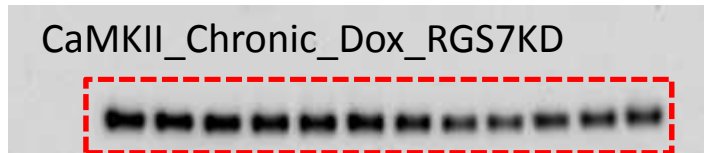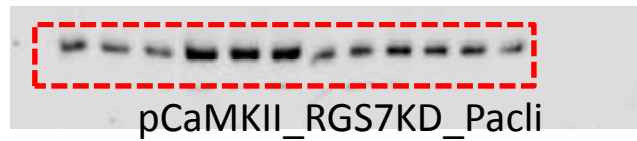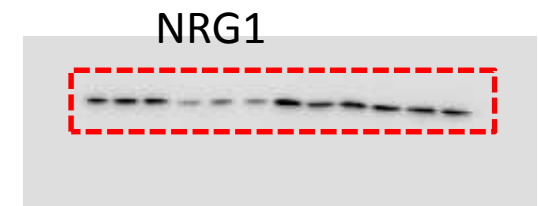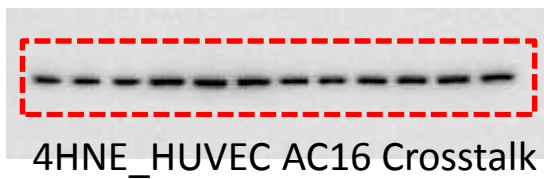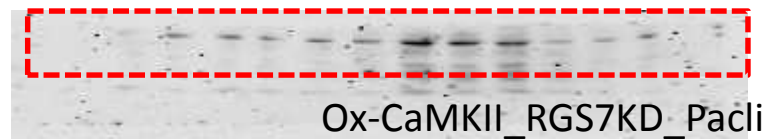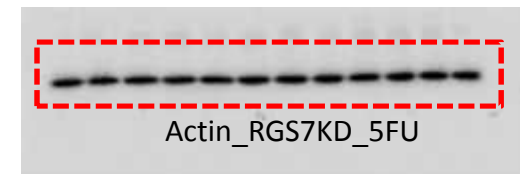

**RGS7\_RGS7KD\_Pacl**

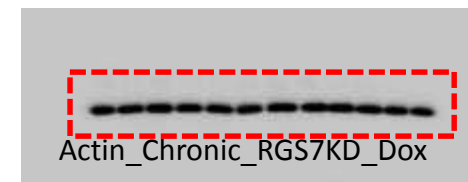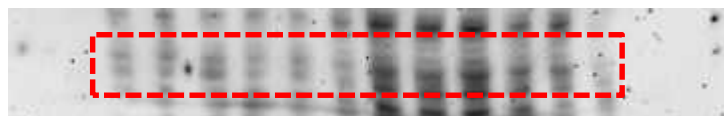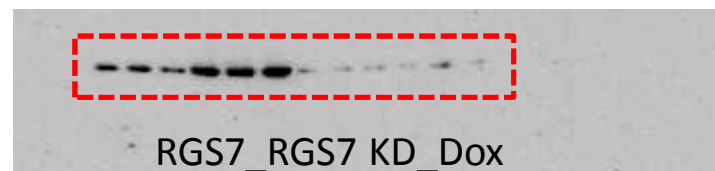

Actin\_Differenet drugs

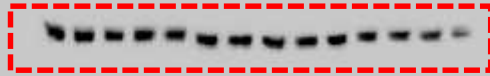

pATM\_MCF\_RGS6KD

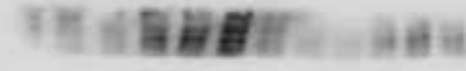

pATM\_MDA\_RGS6KD

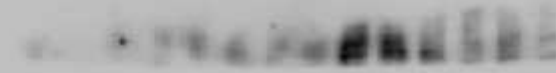

Actin\_MDA\_RGS6KD

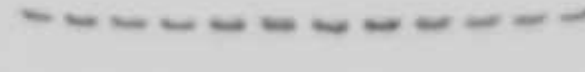

Actin\_MCF\_RGS6KD

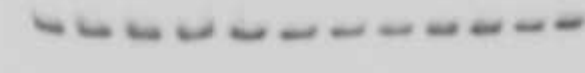

pCaMKII\_diff drugs\_ipsc CM

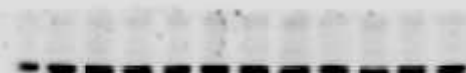

oxCaMKII\_AC16\_DOX\_RGS7KD

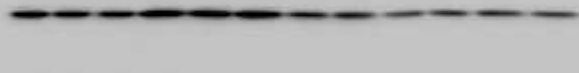

RGS6\_RGS6KD MCF7

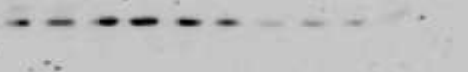

Pp53\_RGS7KD\_Cancer Cell

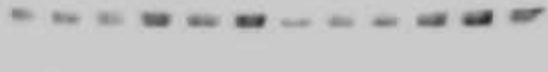

pCaMKII\_diff drugs\_ipsc CM

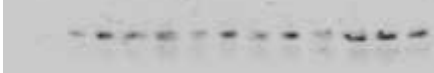

pp53\_MDA MB\_RGS7KD

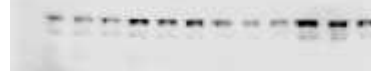

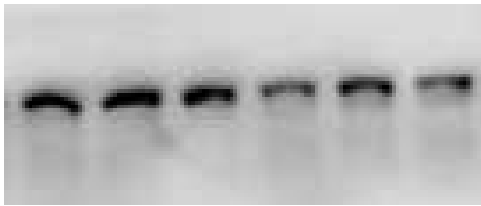

RGS7\_KD2\_Heart Culture

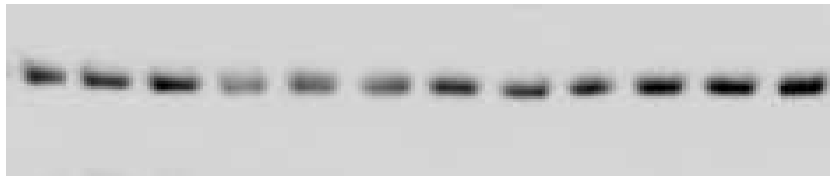

RGS7KD\_Different organs

RGS7\_MCF7 cells\_KD+Dox

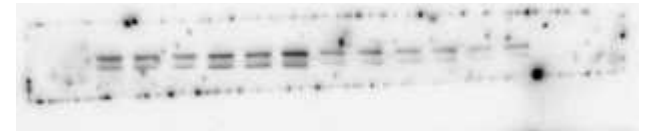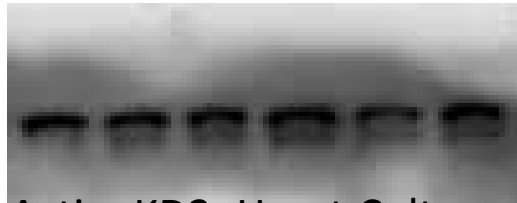

Actin\_KD2\_Heart Culture

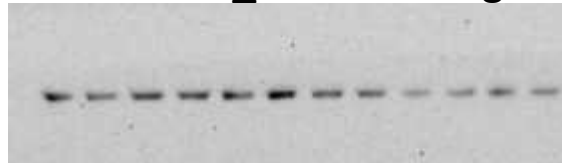

Actin\_RGS7KD\_Different organs

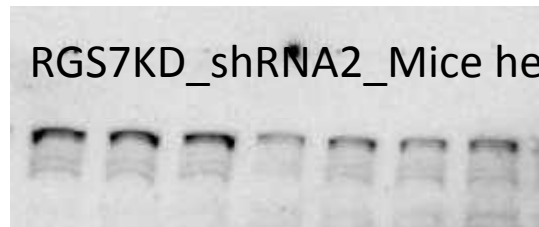

RGS7KD\_shRNA2\_Mice heart

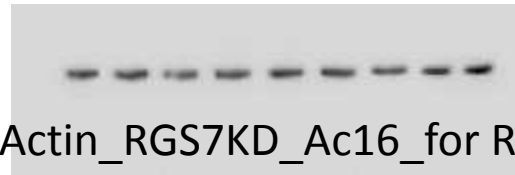

Actin\_RGS7KD\_Ac16\_for RGS6 corelation

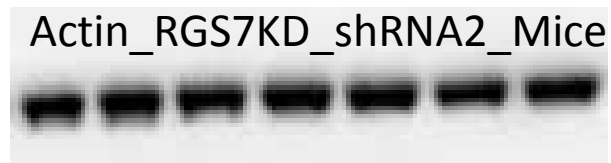

Actin\_RGS7KD\_shRNA2\_Mice heart

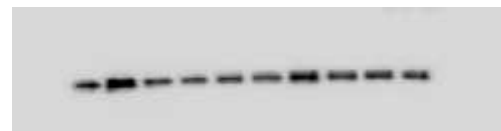

RGS6\_RGS7KD\_Ac16\_for RGS6 corelation

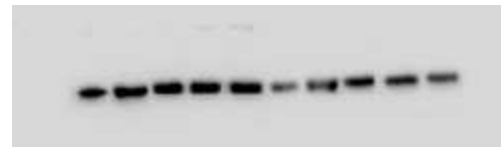

RGS7KD\_Ac16\_for RGS6 corelation

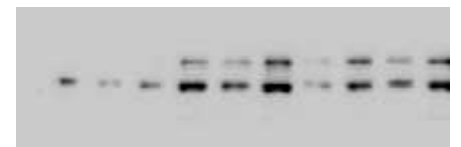

ATM\_MDA MB cell

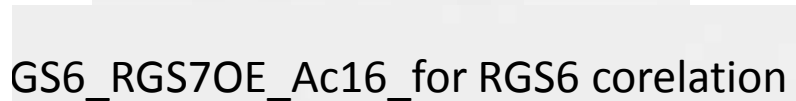

GS6\_RGS7OE\_Ac16\_for RGS6 corelation

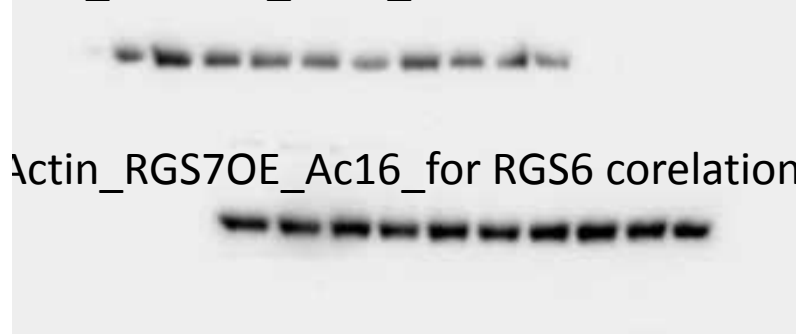

Actin\_RGS7OE\_Ac16\_for RGS6 corelation

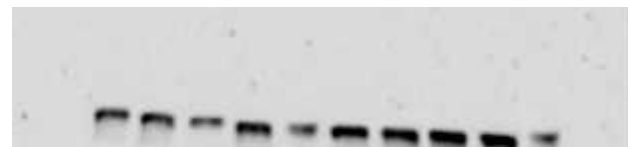

RGS7OE\_Ac16\_for RGS6 corelation

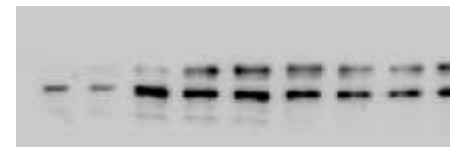

ATM\_MCF cells\_KD

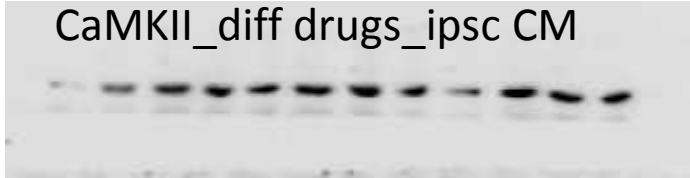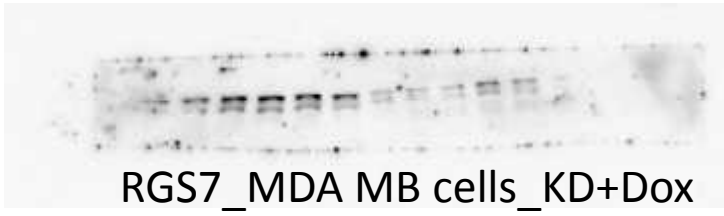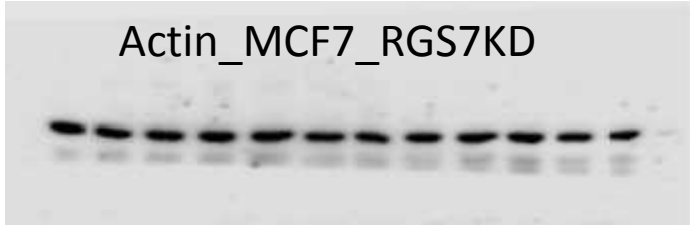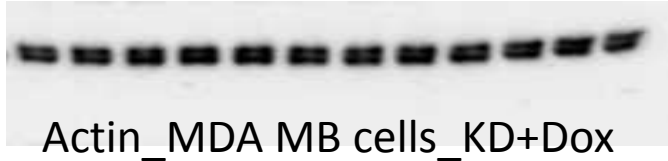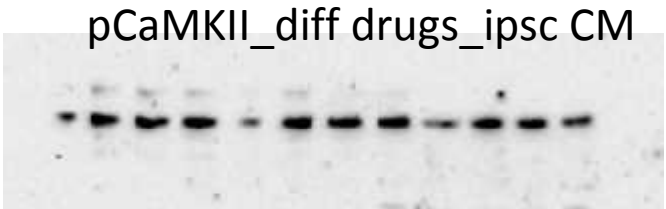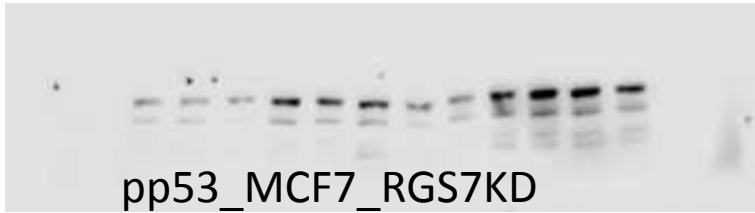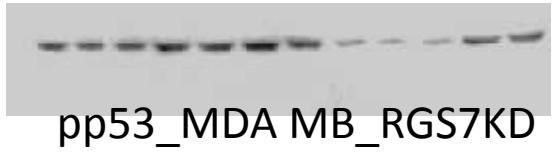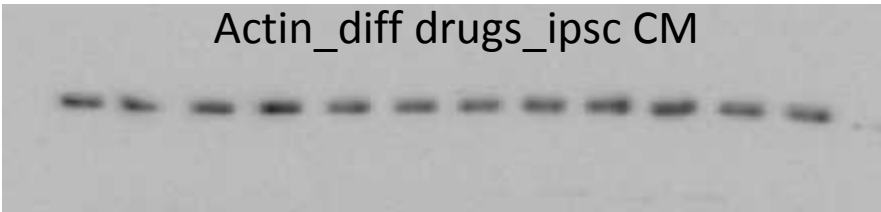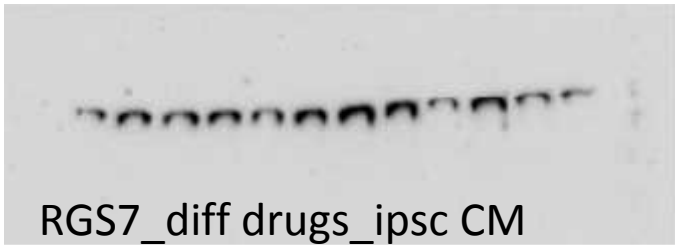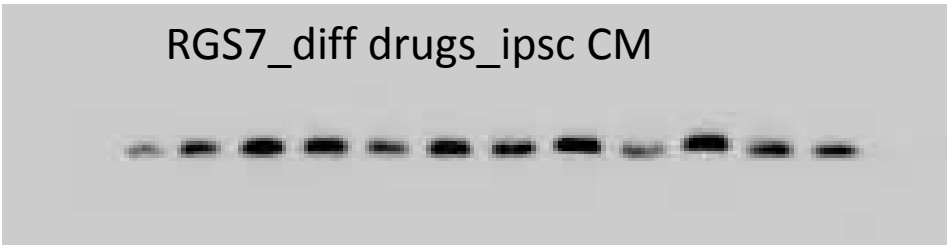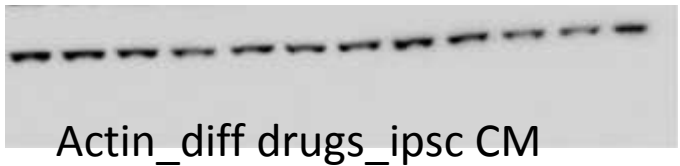

p-CaMKII\_RGS7KD 2\_HUVEC

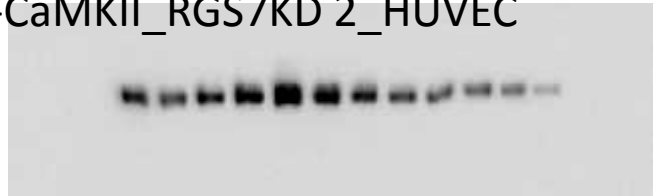

Ox-CaMKII\_RGS7KD 2\_HUVEC

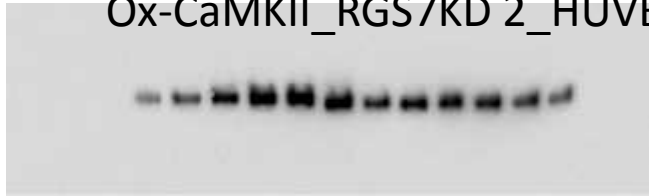

CaMKII\_RGS7KD 2\_HUVEC

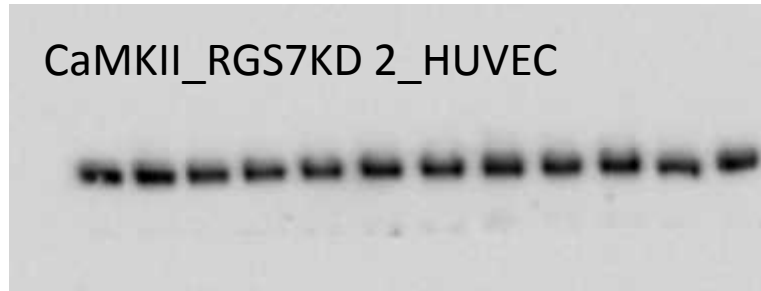

Actin\_RGS7KD 2\_HUVEC

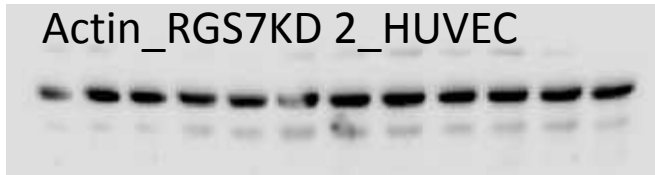

NRG1\_RGS7KD 2\_HUVEC

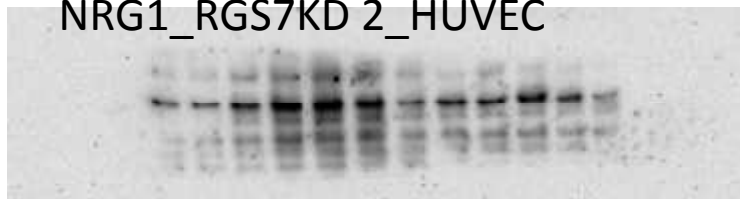

RGS7\_RGS7KD 2\_HUVEC

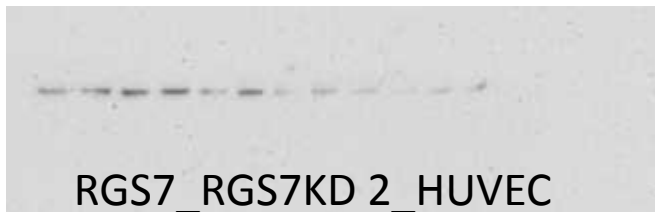

iNOS\_RGS7KD 2\_HUVEC

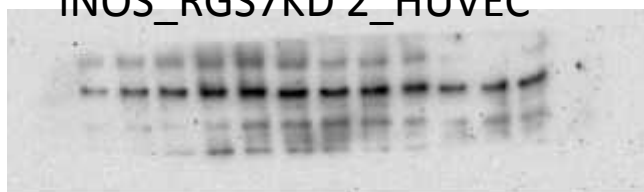

RGS7\_RGS7KD 2\_HUVEC

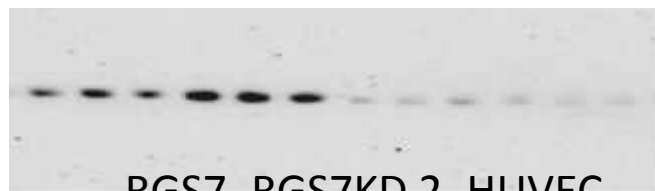

4HNE\_RGS7KD 2\_HUVEC

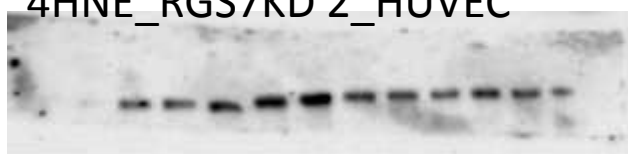

Actin\_RGS7KD\_Different organs

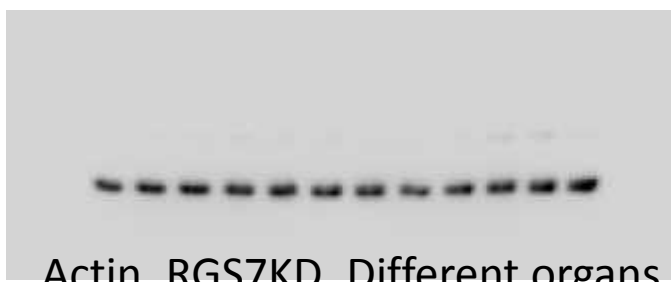



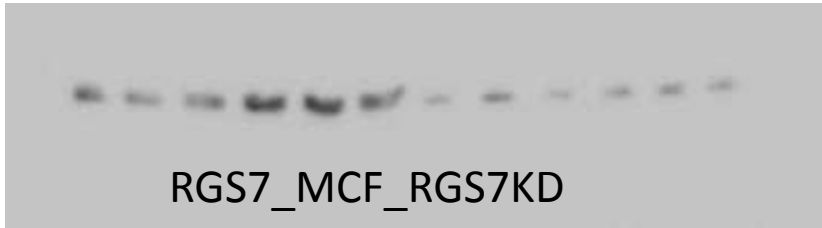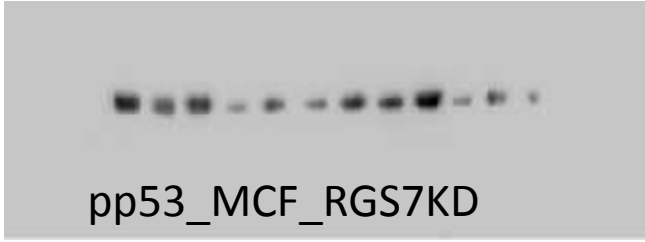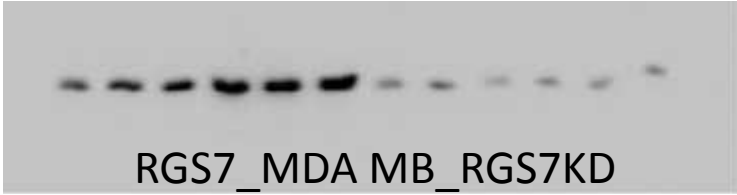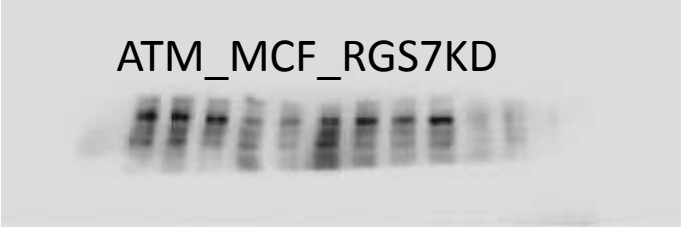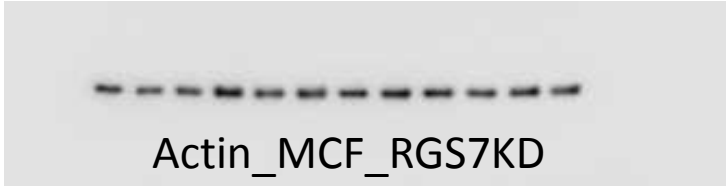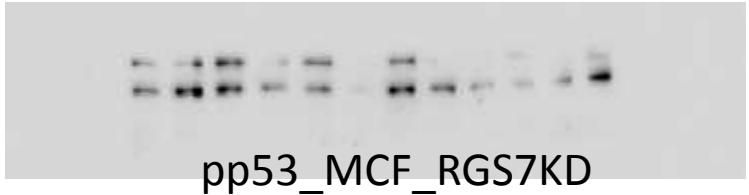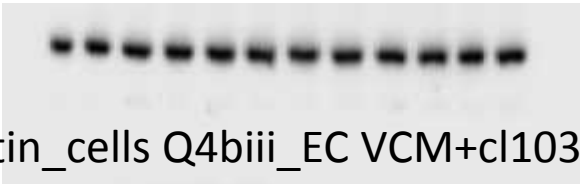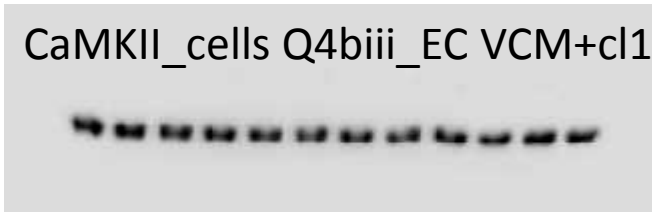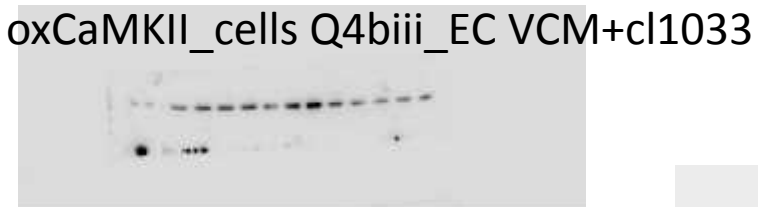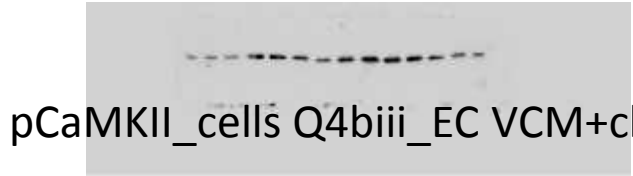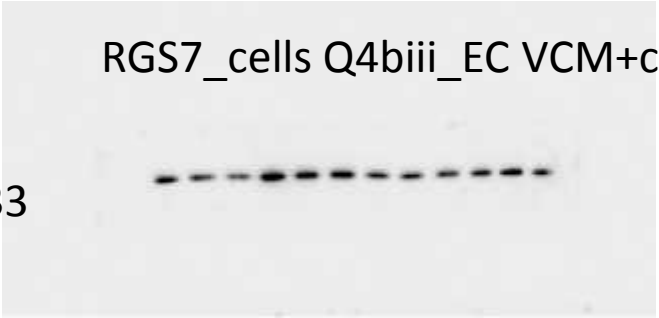

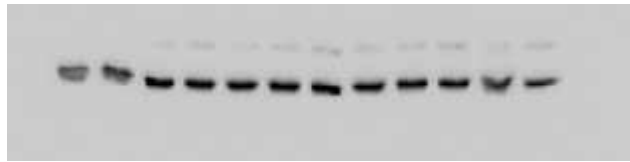

Actin\_MDA MB\_RGS7KD

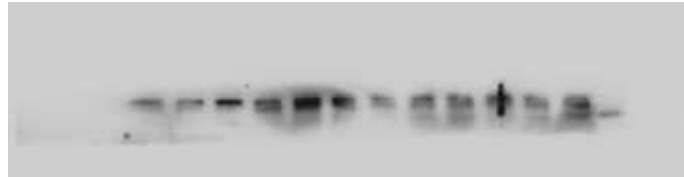

pATM\_MCF\_RGS7KD

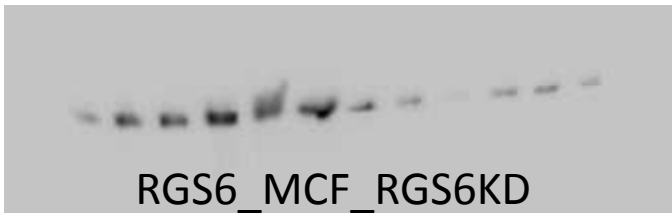

RGS6\_MCF\_RGS6KD

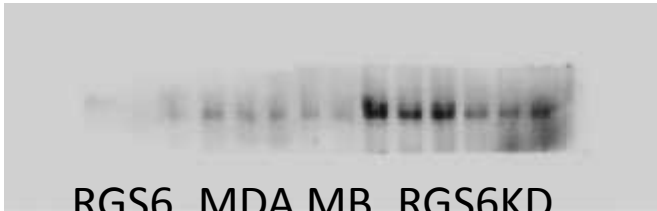

RGS6\_MDA MB\_RGS6KD

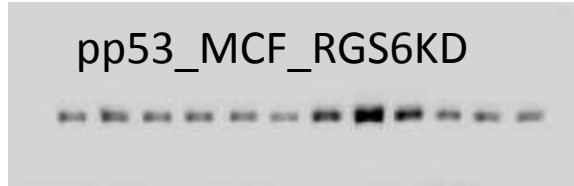

pp53\_MCF\_RGS6KD

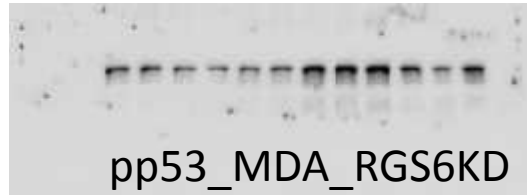

pp53\_MDA\_RGS6KD
